# Supplementary material for: Marine endophytic fungi associated with Halopteris scoparia (Linnaeus) Sauvageau as producers of bioactive secondary metabolites with potential dermocosmetic application
Source: PubMed Central journal article supplement (PMC8118457; doi:10.1371/journal.pone.0250954), 2021-05-13
Supplement: pone.0250954.s002.pdf [file pone.0250954.s002.pdf]

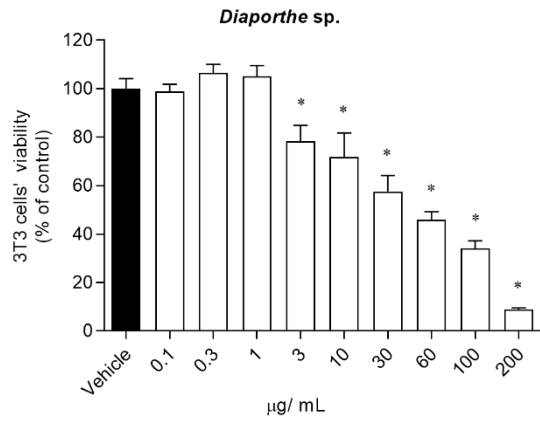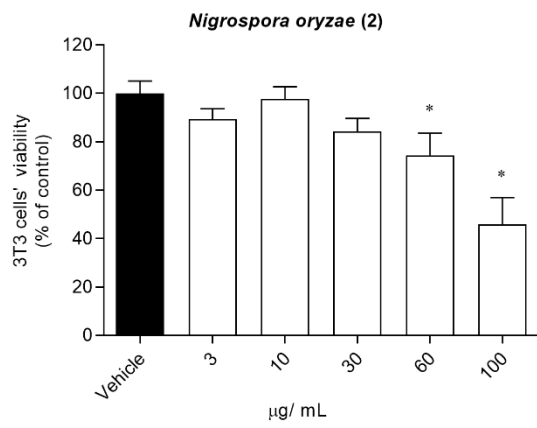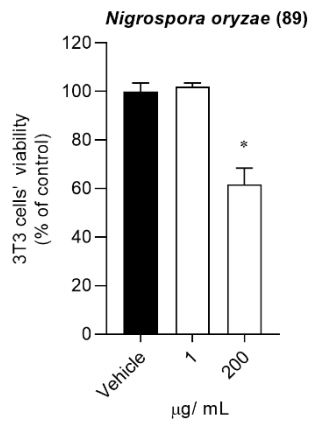

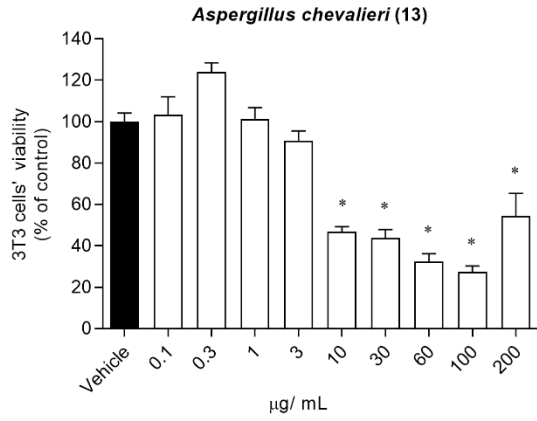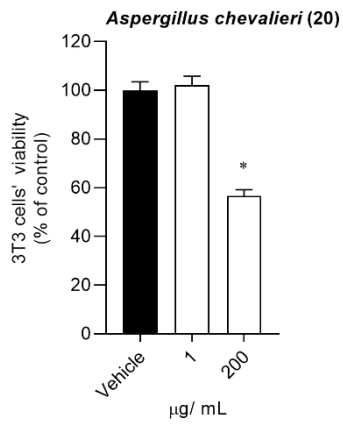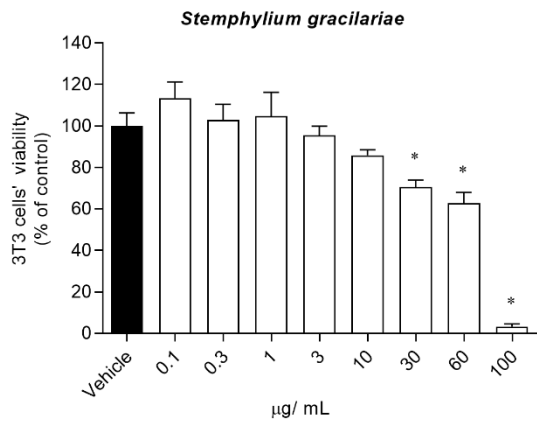

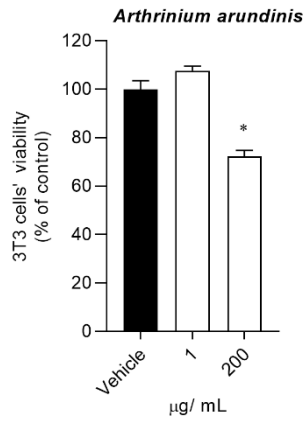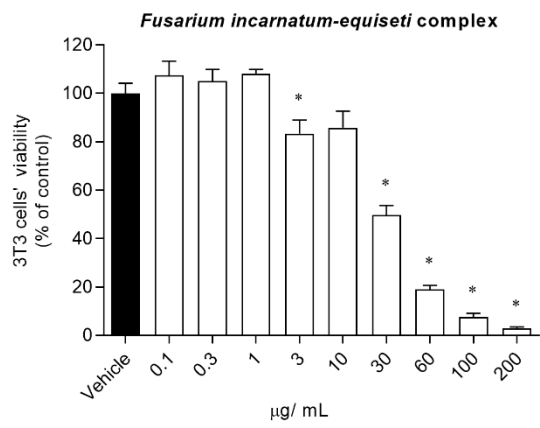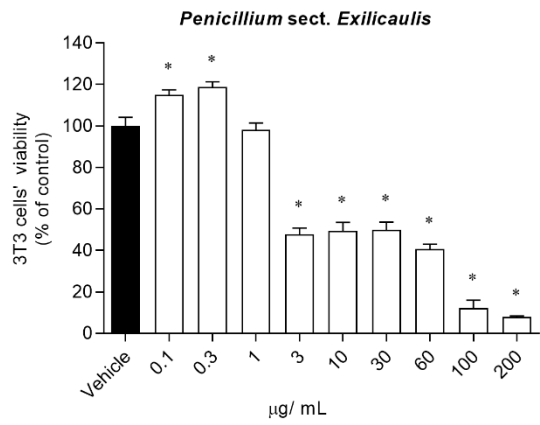

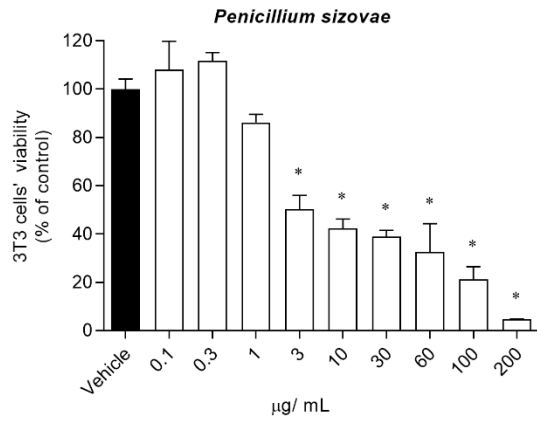

**S2 Fig.** 3T3 cells' viability following 24 h of exposure to the crude extracts obtained from endophytic fungi associated with *Halopteris scoparia* (0.1-200 µg/ mL) and expressed as % of the control. The values correspond to mean ± SEM. \* represents significant differences (One-way ANOVA, Dunnett's test;  $p < 0.05$ ) when compared with the vehicle.
